# Supplementary material for: Promotoras de Salud in a Father-Focused Nutrition and Physical Activity Program for Border Communities: Approaches and Lessons Learned from Collaboration
Source: MDPI journal article supplement (doi:10.3390/ijerph191811660), 2022-09-16
Supplement: s1 [file s1]

**Supplementary Table S1: Detailed training activities for the promotoras**

| <b>Training Activity</b>                                                            | <b>Date</b>                       | <b>Duration</b>                                         | <b>Mode</b> |
|-------------------------------------------------------------------------------------|-----------------------------------|---------------------------------------------------------|-------------|
| Physical Activity - Accelerometry (fathers)                                         | Between 11/2017 and 01/2018       | 3 days (3 full work days, between 11/2017 and 01/2018)  | In person   |
| Physical Activity - Accelerometry (children)                                        | Between 11/2017 and 01/2018       | 1 day                                                   | In person   |
| Physical Activity - Accelerometry (Mothers)                                         | Between 02/2018 and 04/2018       | 1 day                                                   | In person   |
| Varied training activities (program goals and description of sessions)              | 04/24/2018 through 04/26/2018     | 3 days (3 full work days: 04/24, 04/25, and 04/26/2018) | In person   |
| Family Functioning Survey Booster                                                   | 04/27/2018                        | 1.5 hour                                                | Virtual     |
| Physical Activity – Accelerometry (for non-removable accelerometers)                | 05/2018                           | 2 hours                                                 | In person   |
| Varied training activities (sessions 1-3)                                           | 05/23/2018 through 05/25/2018     | 3 days                                                  | In person   |
| Motivational Interviewing (MI)                                                      | 06/15/2018 through 06/16/2018     | 2 days                                                  | In person   |
| Varied training activities for program, including new MI additions (sessions 1 - 3) | 06/27/18 through 06/29/18         | 3 days                                                  | In person   |
| Varied training activities for program, including new MI additions (sessions 4-6)   | 07/09/18 through 07/13/18         | 4 days                                                  | In person   |
| Nutrition - Welcome recipes                                                         | Between 05/01/2018 and 07/31/2018 | 2 days                                                  | Virtual     |

|                                                                                                                                                                                                        |                                   |           |                       |
|--------------------------------------------------------------------------------------------------------------------------------------------------------------------------------------------------------|-----------------------------------|-----------|-----------------------|
| Creation and review of videos focused on nutrition skills with recipe preparation, MI skills, and leading physical activity lessons                                                                    | Between 05/01/2018 and 07/31/2018 | NR        | In person and virtual |
| Physical Activity – Accelerometry for new team members                                                                                                                                                 | 08/2018                           | 1 day     | In person             |
| MI Booster                                                                                                                                                                                             | 08/09/2018                        | 2 hours   | Virtual               |
| Nutrition - Shopping, food preparation, and cooking                                                                                                                                                    | 08/13/2018 through 08/15/2018     | 3 days    | In person             |
| Nutrition - Survey (pre-program)                                                                                                                                                                       | 08/2018                           | 2 days    | Virtual               |
| Nutrition - Anthropometry Booster                                                                                                                                                                      | 08/2018                           | 1.5 hours | Virtual               |
| Nutrition – Welcome recipes (with videos and promotora-led discussion)                                                                                                                                 | 08/2018                           | 4 hours   | Virtual and in-person |
| Varied training activities with focus on Nutrition - Shopping, making welcome recipes, delivering cooking lessons. Also, included practice, troubleshooting, and role-playing with interactive lessons | 09/03/2018 through 09/07/2018     | 5 days    | In person             |
| Logistics, pre-program measurement, anthropometry booster training, role-playing with sessions, and completing full-session run throughs with debriefs                                                 | 09/26/2018 through 09/29/2018     | 4 days    | In person             |

|                                                                                                                                                                                                      |                               |        |           |
|------------------------------------------------------------------------------------------------------------------------------------------------------------------------------------------------------|-------------------------------|--------|-----------|
| Nutrition - Welcome recipes (practice, troubleshooting, and discussion)                                                                                                                              | 10/2018                       | 3 days | In person |
| Reviewing and role-playing with pre-program surveys for Family Functioning, Nutrition, and Physical Activity                                                                                         | 10/2018                       | 2 days | In person |
| Individualized training to review sessions one-by-one, practice delivering all components, and gain feedback (completed over three-week period)                                                      | 11/2018                       | NR     | In person |
| Varied training activities (including reviewing Nutrition Survey, Accelerometry, Anthropometry, and practicing with recipes)                                                                         | 11/2018                       | 1 day  | In person |
| Nutrition - Anthropometry. Pre-testing. Practice measuring height and weight with 30 individuals (10 fathers, mothers, and children). Included reviewing procedures, troubleshooting, and discussion | 11/2018                       | NR     | In person |
| Varied training activities (including shopping for materials and foods, practicing welcome recipes, full session run                                                                                 | 12/10/2018 through-12/14/201) | 5 days | In person |

|                                                                                                                                  |                                |        |           |
|----------------------------------------------------------------------------------------------------------------------------------|--------------------------------|--------|-----------|
| throughs, with focus on role playing, trouble shooting, and booster training for Veggie Meter, anthropometry, and accelerometry) |                                |        |           |
| Pre-program measurement, including role playing, troubleshooting, and discussion                                                 | 01/24/19 through 01/26/19      | 3 days | In person |
| Booster training - Reviewing and practicing all sessions with feedback (completed over a 10-day period)                          | 01/2019                        | NR     | In person |
| Pre-testing sessions. Practice run-throughs of full sessions of six-week program for pre-tests (completed on six different days) | 02/06/2019 through 03/22/2019  | NR     | In person |
| MI Booster                                                                                                                       | 02/22/2019 through 02/23/2019  | 2 days | In person |
| Review, troubleshooting, and discussion of pre-program surveys for Family Functioning and Nutrition                              | 03/18/2019 through 03/19/2019) | 2 days | In person |
| Debrief interviews with participating families from pre-testing or practice run-throughs                                         | 03/28/2019 though 04/12/2019   | NR     | In person |
| Pre-testing sessions. Review and practice of pre-program measures,                                                               | 03/2019                        | NR     | In person |

|                                                                                              |                                   |                               |           |
|----------------------------------------------------------------------------------------------|-----------------------------------|-------------------------------|-----------|
| including role-playing with volunteers, troubleshooting, and discussion                      |                                   |                               |           |
| Nutrition - Veggie Meter; and Physical Activity – Accelerometry (data management procedures) | 04/03/2019                        | 3 hours                       | In person |
| Nutrition - Learn2Serve Food Handlers Training                                               | 04/2019                           | 2 hours                       | Virtual   |
| Pre-program measurement booster                                                              | 04/24/2019                        | 1 day                         | In person |
| Logistics (scheduling with program calendar)                                                 | 05/2019                           | 1 day                         | In person |
| Recruitment                                                                                  | 05/2019                           | 1 day                         | In person |
| Varied mini-trainings for additional team members                                            | between 05/06/2019 and 06/21/2019 | 2 hours to 1 day per training | In person |
| Pre-program booster                                                                          | 06/05/2019 through 06/07/2019     | 3 days                        | In person |
| Pre-program booster                                                                          | 06/27/2019 through 06/28/2019     | 2 days                        | In person |
| <b><i>Program starts</i></b>                                                                 | 07/2019                           |                               |           |
| Measurement booster training                                                                 | 08/2019                           | 4 hours                       | In person |
| Mini-training for new team members                                                           | Between 08/05/2019 and 10/22/2019 | 2 hours to 1 day per training | In person |
| Nutrition - Texas Food Handlers Course                                                       |                                   | 2 hours                       | Virtual   |
| Maintenance measurement                                                                      | 11/21/2019                        | 5 hours                       | Virtual   |
| Maintenance measurement booster                                                              | 12/10/2019 and 12/11/2019         | 4 hours                       | In person |

|                                        |                           |              |           |
|----------------------------------------|---------------------------|--------------|-----------|
| Call log training and booster training | 01/16/2020 and 01/30/2020 | 1.75 hours   | In person |
| <i>Program ends</i>                    | 02/2020                   |              |           |
| Total time in training                 |                           | 536.75 hours |           |

The program coordinator (LG) provided records for activities and training sessions. The lead author (CMJ) extracted details from coordinator's documentation. When exact dates were not available, a date range was given. Training activities were to prepare the promotoras for their roles in the HEPP Program, and prioritized knowledge and skills related to the entire program, including theoretical foundation, nutrition and physical activity knowledge, and program outcomes, program structure and curricula, program delivery and evaluation. Generally, the academic-based researchers developed and led training, in collaboration with the core promotoras. Over time, the core promotoras led training for the other promotoras on the team. Total time did not include any activities where duration was not reported (NR). Calculation estimated 8-hour days, but many training days lasted beyond 8 hours. Thus, the estimate of total time is conservative.
